# Supplementary material
Source: PubMed Central journal article supplement (PMC10603574)
Supplement: jama-e2317494-s002.pdf [file jama-e2317494-s002.pdf]

## Data Sharing Statement

Ahmed. Labor Unionization Among Physicians in Training. *JAMA*. Published October 26, 2023.  
doi:10.1001/jama.2023.17494

### Data

**Data available:** No

### Additional Information

**Explanation for why data not available:** The election reports from the National Labor Relations Board are available on their website and can be assessed or downloaded:

<https://www.nlr.gov/reports/agency-performance/election-reports>.
